# Supplementary material for: The Framework For Ice Sheet–Ocean Coupling (FISOC) V1.1
Source: Copernicus journal article supplement (doi:10.5194/gmd-14-889-2021), 2021-02-11
Supplement: Supplementary file 1 [file gmd-14-889-2021-supplement.zip]

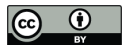

## *Supplement of*

# **The Framework For Ice Sheet–Ocean Coupling (FISOC) V1.1**

**Rupert Gladstone et al.**

*Correspondence to:* Rupert Gladstone ([rupertgladstone1972@gmail.com](mailto:rupertgladstone1972@gmail.com))

- [gmd-14-889-2021-supplement-title-page.pdf](#)
- [gmd-2020-206-supplement-version3.pdf](#)

The copyright of individual parts of the supplement might differ from the CC BY 4.0 License.
